# Supplementary material for: Complete functionalisation of small and large diameter bromopolystyrene beads; applications for solid-supported reagents, scavengers and diversity-oriented synthesisElectronic supplementary information (ESI) available: experimental techniques, apparatus, characterisation and spectroscopic data. See http://www.rsc.org/suppdata/ob/b4/b406488g/
Source: Royal Society of Chemistry journal article supplement (doi:10.1039/b406488g), 2004-01-01
Supplement: b406488g.pdf [file b406488g.pdf]

# Complete functionalisation of small and large diameter bromopolystyrene beads; applications for solid-supported reagents, scavengers and diversity-oriented synthesis

Gemma L. Thomas,<sup>a</sup> Mark Ladlow<sup>b</sup> and David R. Spring<sup>\*a</sup>

<sup>a</sup> Department of Chemistry, University of Cambridge, Lensfield Road, Cambridge, UK. E-mail: drspring@ch.cam.ac.uk

<sup>b</sup> GSK Cambridge Technology Centre, University of Cambridge, Lensfield Road, Cambridge, UK.

## Supplementary Material

### Experimental Techniques and Apparatus

Except as otherwise indicated, reactions were carried out under argon with dry, freshly distilled solvents. Dry tetrahydrofuran was dispensed from a delivery system which passes the solvent through packed columns of dry neutral alumina and Q5 reactant. Dichloromethane was distilled from calcium hydride. *n*-BuLi in hexane (Aldrich) and *i*-PrMgCl in diethyl ether (Aldrich) were titrated with 1,10-phenanthroline and anhydrous 2-butanol before use.<sup>1</sup> All other reagents were purified in accordance with the instructions in "Purification of Laboratory Chemicals"<sup>2</sup> or used as obtained from commercial sources.

Yields refer to chromatographically and spectroscopically pure compounds. All reactions were monitored by thin layer chromatography (TLC) using glass plates precoated with Merck silica gel 60 F<sub>254</sub> or aluminum oxide 60 F<sub>254</sub>. Visualization was by the quenching of UV fluorescence ( $\lambda_{\text{max}} = 254 \text{ nm}$ ) or by staining with ceric ammonium molybdate or potassium permanganate or Dragendorff's reagent (0.08% w/v bismuth subnitrate and 2% w/v KI in 3M aq. AcOH). Retention factors ( $R_f$ ) are quoted to 0.01. Melting points were obtained using a Mel-Temp II melting point apparatus and are uncorrected. Infrared spectra were recorded neat on a Perkin-Elmer Spectrum One spectrometer with internal referencing. Absorption maxima ( $\nu_{\text{max}}$ ) are reported in wavenumbers ( $\text{cm}^{-1}$ ) and the following abbreviations are used: w, weak; m, medium; s, strong; br, broad. Proton magnetic resonance spectra were recorded on Bruker Ultrashield 400 or 500.<sup>3</sup> Proton assignments are supported by  $^1\text{H}$ - $^1\text{H}$  spectra where necessary. Chemical shifts ( $\delta_{\text{H}}$ ) are quoted in ppm and are referenced to the residual non-deuterated solvent peak. Coupling constants ( $J$ ) are reported in Hertz to the nearest 0.5 Hz. Data are reported as follows: chemical shift, integration, multiplicity [br, broad; s, singlet; d, doublet; t, triplet; q, quartet; qui, quintet; sept, septet; m, multiplet; or as a combination of these (*e.g.* dd, dt, *etc.*)], coupling constant(s) and assignment. Diastereotopic protons are assigned as X and X', where the ' indicates the higher field proton. Carbon magnetic resonance spectra were recorded on Bruker Ultrashield 500 spectrometers. Carbon spectra assignments are supported by DEPT editing and where necessary  $^{13}\text{C}$ - $^1\text{H}$  (HMQC) correlations. Chemical shifts ( $\delta_{\text{C}}$ ) are quoted in ppm to the nearest 0.01 ppm, and are referenced to the deuterated solvent. Phosphorous magnetic resonance spectra ( $^{31}\text{P}$ ) were recorded on a DPX 400 MHz spectrometer. Chemical shifts ( $\delta_{\text{P}}$ ) are quoted in ppm to the nearest 0.01 ppm and are referenced to  $\text{H}_3\text{PO}_4$  (external). Only molecular ions, fractions from molecular ions and other major peaks are reported. LCMS spectra were recorded on an HP/Agilent MSD LC-MS APCI 120-1000 full gradient ACq T= 1 min 1  $\mu\text{l}$ . High resolution mass measurements were made by the EPSRC mass spectrometry service (Swansea) and reported mass values are within the error limits of  $\pm 5 \text{ ppm}$  mass units. Microanalyses were performed by the University of Cambridge Microanalytical Laboratory in the Department of Chemistry, and are quoted to the nearest 0.1% for all elements except for hydrogen, which is quoted to the nearest 0.05%. Reported atomic percentages are within the error limits of  $\pm 0.4\%$ .

### Experimental Procedures

**General Procedure For Alcohol Attachment:** Dry silane polystyrene **3** (ca. 2 mequiv. per gram) was added to a dry, fritted polypropylene column (Bruker) fitted with a Teflon stopcock and capped with a suba seal. The vessel was evacuated and purged with Ar. The beads were swollen with  $\text{CH}_2\text{Cl}_2$  (10 ml per gram of beads) and  $\text{TMSCl}$  (6 equiv.) and occasionally agitated over 30 min, at room temperature, under Ar. The solution was then drained under positive Ar pressure, and washed/drained three times with anhydrous  $\text{CH}_2\text{Cl}_2$ . The beads were then suspended in a  $\text{CH}_2\text{Cl}_2$  solution of 1,3-dichloro-5,5-dimethylhydantoin (3 equiv.) and agitated occasionally over 2 h, at room temperature, under Ar. The solution was then drained under positive Ar pressure, and washed/drained two times with anhydrous  $\text{CH}_2\text{Cl}_2$  to give **4**. The silyl chloride beads were suspended in a  $\text{CH}_2\text{Cl}_2$  solution of 2,6-lutidine (4 equiv.), DMAP (0.1 equiv.) and anhydrous alcohol (3 equiv.; 1.5 equiv. can be used if the alcohol is valuable), the mixture was agitated then left to stand overnight, at room temperature, under Ar. The solution was then drained under positive Ar pressure (excess alcohol can be recovered), and washed/drained as in ref. 10. The beads were air-dried under suction for 2 h with occasional agitation, and then placed under high vacuum.

**General Procedure For Alcohol Cleavage:** The beads (100 mg) were swollen in THF (0.5 ml) and  $\text{HF}\cdot\text{Pyr}$  (50  $\mu\text{l}$ , 1.77 mmol) was added. The vials were sealed and agitated for 2.5 h, then quenched using trimethylethoxysilane. The vials were agitated for a further 30 min to ensure complete quenching. Then the solvent was filtered through a plug of silica gel and the resin washed with  $\text{CH}_2\text{Cl}_2$ . The solvent was removed *in vacuo* and the product purified by column chromatography.

**General Mitsunobu Reaction Procedure:** To a mixture of carboxylic acid (1 equiv.), alcohol (1.5 equiv.) and polymer bound triphenylphosphine (0.9 mmol/g, 1.5 equiv.) in THF (ca. 0.1M) under nitrogen at 0 °C was added di-*tert*-butyl azodicarboxylate (1.5 equiv.) in THF (1 ml). The reaction was warmed to room temperature and stirred overnight. The reaction was filtered and the resins washed with  $\text{CH}_2\text{Cl}_2$ . The organic filtrate was washed with 3N HCl (x 2), brine (x 2) dried ( $\text{MgSO}_4$ ), filtered and concentrated *in vacuo*. The crude product was purified by column chromatography using  $\text{CH}_2\text{Cl}_2$  as the eluent to yield a colourless oil.

1 Watson, S. C.; Eastham, J. F. *J. Organometal. Chem.* **1967**, 9, 165-168.

2 Armarego, W. L. F.; Perrin, D. D. *Purification of Laboratory Chemicals, Fourth Edition*; Butterworth-Heinemann: Oxford, 1997.

3 See: <http://www-methods.ch.cam.ac.uk/meth/nmr.html>

### 3,4,5-Trimethoxy-benzoic acid pent-4-enyl ester

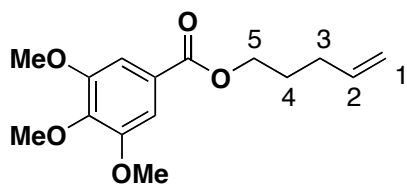

$R_f$  0.29 ( $\text{SiO}_2$ ;  $\text{CH}_2\text{Cl}_2$ );  $\nu_{\max}$  (neat)/ $\text{cm}^{-1}$  1712s (C=O), 1124s (C-O);  $\delta_{\text{H}}$  (500 MHz;  $\text{CDCl}_3$ ) 7.32 (2H, s, aryl  $\text{CH}$ ), 5.91-5.80 (1H, ddt,  $J$  16.0, 15.0, 10.0 Hz, H2), 5.11-5.07 (1H, d,  $J$  16.0 Hz, H1), 5.04-5.02 (1H, d,  $J$  10.0 Hz, H1'), 4.36-4.33 (2H, t,  $J$  6.5 Hz, H5), 3.92 (9H s,  $\text{OCH}_3$ ), 2.23-2.20 (2H, dt,  $J$  15.0, 6.5 Hz, H3), 1.92-1.84 (2H, tt,  $J$  6.5, 6.0 Hz, H4);  $\delta_{\text{C}}$  (125 MHz;  $\text{CDCl}_3$ ) 166.21 (C), 152.95 (C), 142.24 (C), 137.47 (CH), 125.45 (C), 115.35 ( $\text{CH}_2$ ), 106.85 (CH), 64.56 ( $\text{CH}_2$ ), 60.91 ( $\text{CH}_3$ ), 56.25 ( $\text{CH}_3$ ), 30.18 ( $\text{CH}_2$ ), 27.96 ( $\text{CH}_2$ ); LCMS (MeCN) 3.74 min; 281 ( $\text{MH}^+$ ); HRMS found 281.1385  $\text{C}_{15}\text{H}_{21}\text{O}_5$  ( $\text{MH}^+$ ) required 281.1384.

### 4-Bromo-benzoic acid pent-4-enyl ester

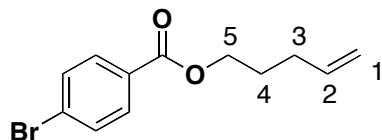

$R_f$  0.81 ( $\text{SiO}_2$ ;  $\text{CH}_2\text{Cl}_2$ );  $\nu_{\max}$  (neat)/ $\text{cm}^{-1}$  1717s (C=O);  $\delta_{\text{H}}$  (500 MHz;  $\text{CDCl}_3$ ) 7.90-7.87 (2H, d,  $J$  8.5 Hz, aryl  $\text{CH}$ ), 7.60-7.55 (2H, d,  $J$  8.5 Hz, aryl  $\text{CH}$ ), 5.88-5.78 (1H, m, H2), 5.10-5.03 (1H, br dt,  $J$  17.0 Hz, H1), 5.02-5.00 (1H, br dt,  $J$  10.0 Hz, H1'), 4.33-4.30 (2H, t,  $J$  6.5 Hz, H5), 2.23-2.18 (2H, dt,  $J$  14.0, 6.5 Hz, H3), 1.90-1.84 (2H, tt,  $J$  7.0, 6.5 Hz, H4);  $\delta_{\text{C}}$  (125 MHz;  $\text{CDCl}_3$ ) 165.86 (C), 137.35 (CH), 131.70 (CH), 131.09 (CH), 129.35 (C), 127.96 (C), 110.00 ( $\text{CH}_2$ ), 64.65 ( $\text{CH}_2$ ), 30.13 ( $\text{CH}_2$ ), 27.88 ( $\text{CH}_2$ ); LCMS (MeCN) 4.60 min, 271 ( $\text{MH}^+$ );

### 3-Methyl-but-2-enoic acid benzyl ester

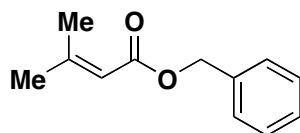

$R_f$  0.88 ( $\text{SiO}_2$ ;  $\text{CH}_2\text{Cl}_2$ );  $\nu_{\max}$  (neat)/ $\text{cm}^{-1}$  1715s (C=O), 1648m (C=C);  $\delta_{\text{H}}$  (500 MHz;  $\text{CDCl}_3$ ) 7.53-7.22 (5H, m, aryl  $\text{CH}$ ), 5.75 (1H, s,  $\text{CHCO}_2\text{Bn}$ ), 5.12 (2H, s,  $\text{CH}_2$ ), 2.18 (3H, s,  $\text{CH}_3$ ), 1.88 (3H, s,  $\text{CH}_3$ );  $\delta_{\text{C}}$  (125 MHz;  $\text{CDCl}_3$ ) 166.41 (C), 157.23 (C), 136.51 (C), 128.51 (CH), 128.11 (C), 128.01 (CH), 115.82 (CH), 65.36 ( $\text{CH}_2$ ), 27.42 ( $\text{CH}_3$ ), 20.28 ( $\text{CH}_3$ ); LCMS (MeCN) 4.15 min; 191 ( $\text{MH}^+$ );

### IR analysis of resins

| <i>Electrophile</i>     | <i>IR absorbance</i>                          |
|-------------------------|-----------------------------------------------|
| $\text{CO}_2$           | 3372 O-H<br>1687 C=O                          |
| Benzophenone            | 3414 O-H<br>1491-1450 C=C                     |
| DMF                     | 1700 C=O (aldehyde)                           |
| 4-Iodophenyl isocyanate | 1654 C=O (amide)                              |
| Allyl bromide           | 3026, 1638, 993, 911 $\text{RCH}=\text{CH}_2$ |
| Trimethyl borate        | 3358 O-H<br>1340 B-O                          |
| $\text{S}_8$            | ~3300 S-H                                     |
| PhSSPh                  | 2857 C-S                                      |

# $^{31}\text{P}$ NMR

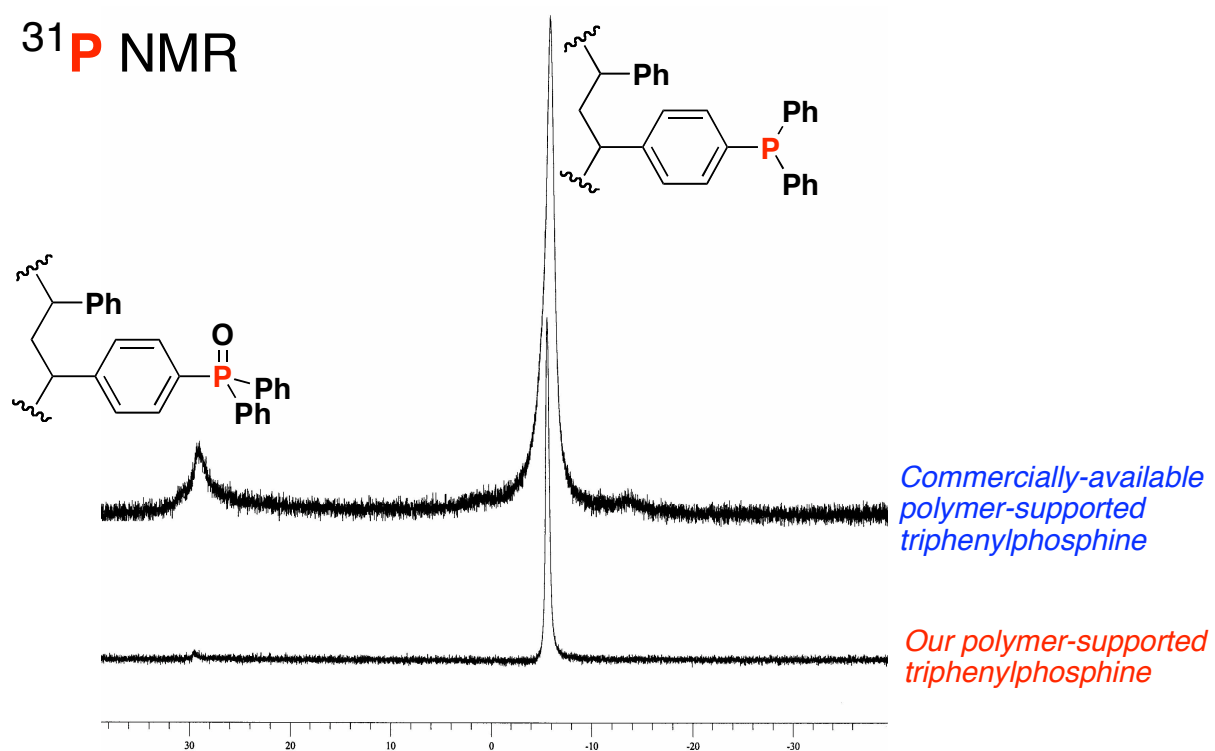

Gel-phase  $^{31}\text{P}$  NMR spectra comparing our polymer-supported triphenylphosphine (**2a**) with a version available commercially (**2b**).

ppm

Standard ATM BB DRX500 1H

Current Data Parameters

NAME g1t-1-7  
EXPNO 1  
PROCNO 1

F2 - Acquisition Parameters

Date\_ 20031023  
Time 16:01  
INSTRUM AV500  
PROBHD 5 mm BB-1H  
PULPROG zgpg30  
TD 65536  
SOLVENT CDCl3  
NS 16  
DS 10330.572 Hz  
SWH 0.157632 Hz  
FIDRES 3.172007 sec  
AQ 48.400 usec  
RG 300.0 K  
TE 1.0000000 sec  
D1

===== CHANNEL f1 =====

NUC1 1H  
P1 10.75 usec  
PL1 -3.00 dB  
SF01 500.2030885 MHz

F2 - Processing parameters

SF 32768  
WDW EM  
SSB 0  
LB 0.30 Hz  
GB 0  
PC 1.00

10 NMR plot parameters

CX 27.00 cm  
CY 13.50 cm  
F1 165.000 ppm  
F2 500.2030885 MHz  
F3 0.000 ppm  
F4 0.00 Hz  
PC 0.44444 ppm/cm  
H2CM 222.31111 Hz/cm

Integral

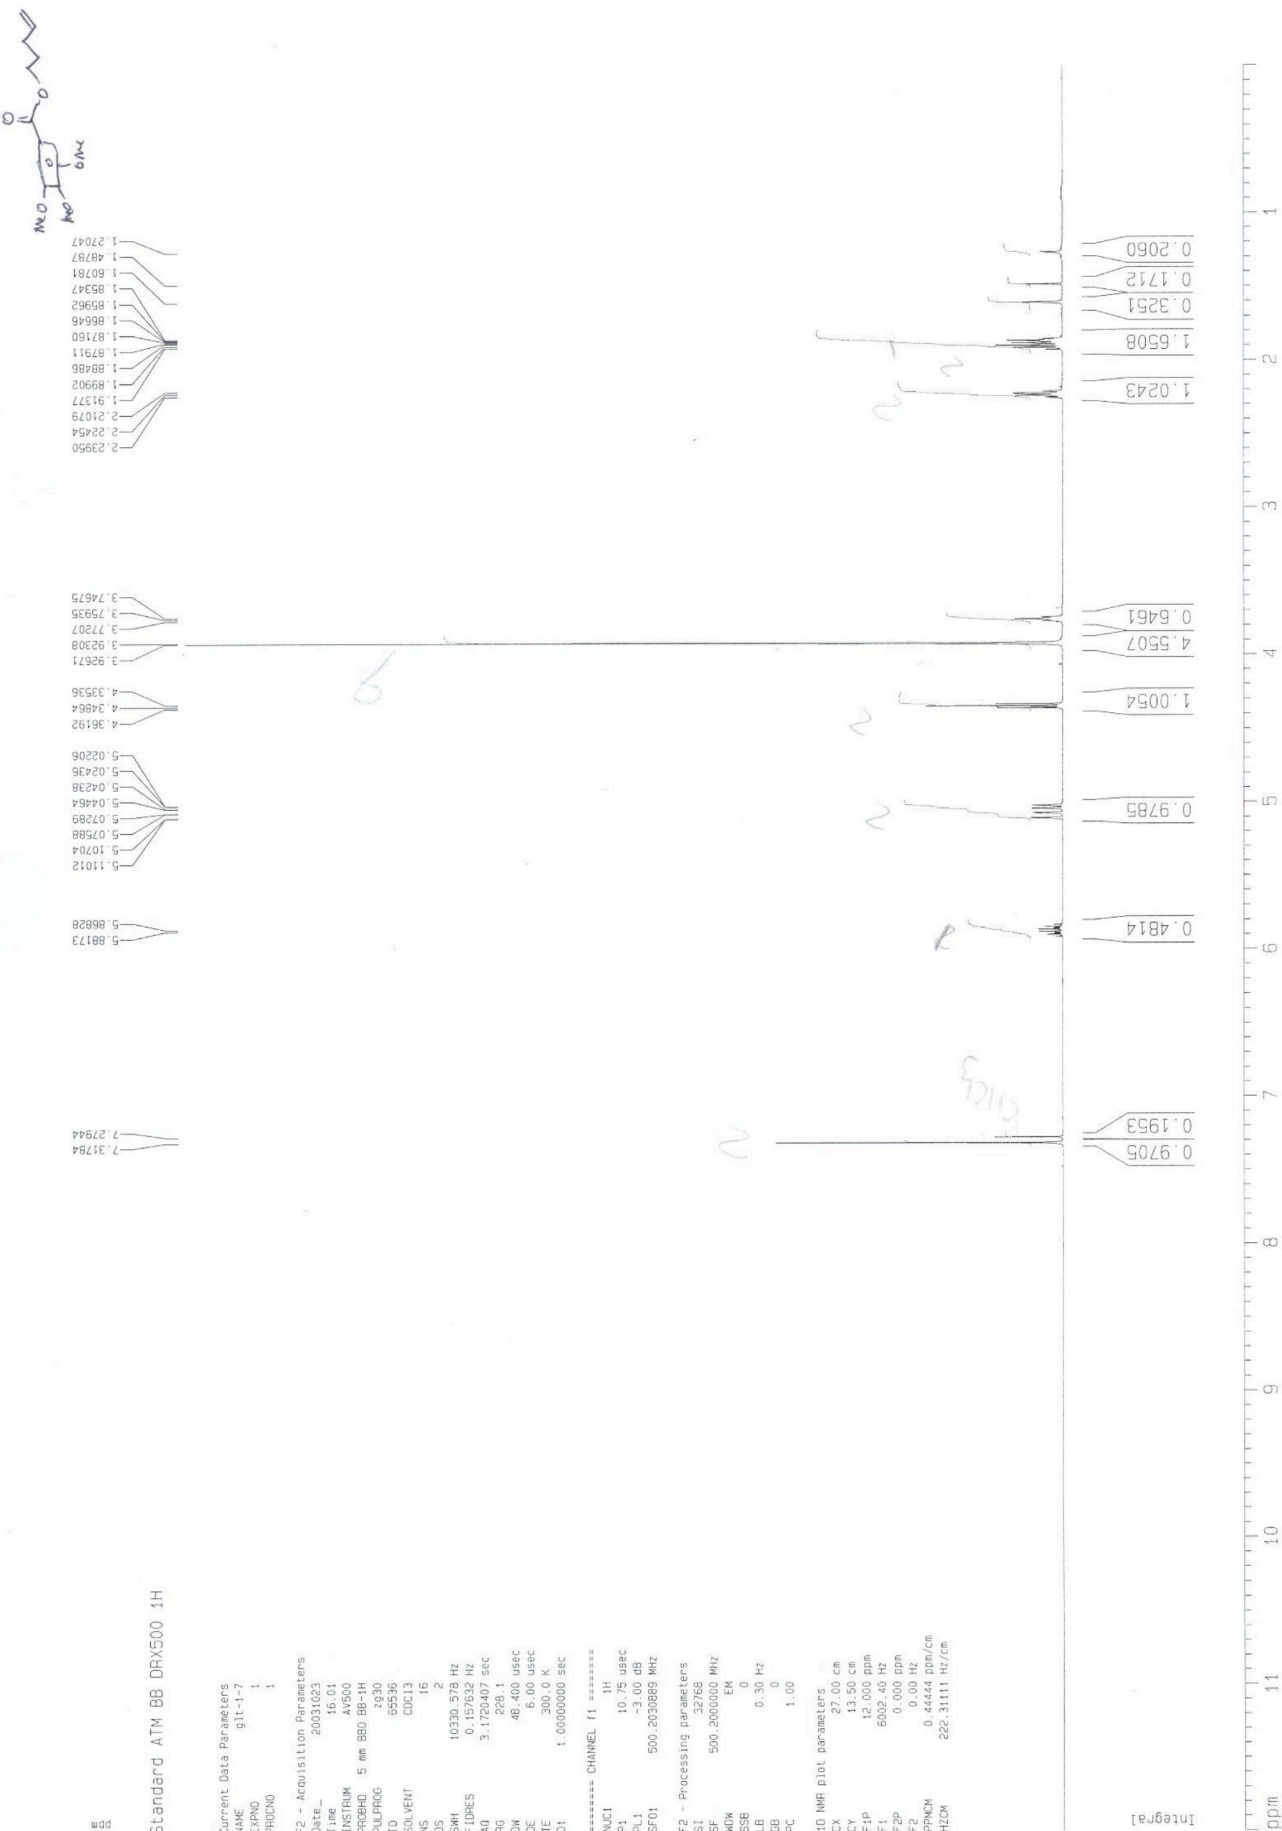



30.187  
27.963  
25.613

56.254  
60.915  
64.561  
67.970

106.847  
115.354

137.473  
142.659

Standard ATM B8 DRX500 DEPT135

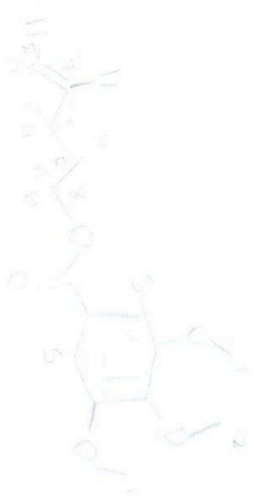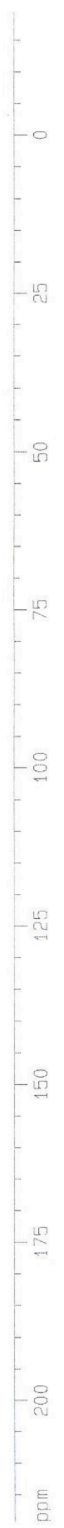

Standard ATM BB DRX500 13C

ppm

Current Data Parameters

NAME glt-1-7a  
EXPNO 1  
PROCNO 1

F2 - Acquisition Parameters

Date\_ 20031024  
Time 15.05  
INSTRUM AV500  
PROBHD 5 mm BBO BB-4H1  
PULPROG zgpg30  
TD 65536  
SOLVENT CDCl3  
NUS 2  
DS 4  
SWH 35211.270 Hz  
FIDRES 0.537281 Hz  
AQ 0.0306754 sec  
RG 11585.2  
DM 14.200 usec  
DE 6.00 usec  
TE 300.0 K  
T1 4.00000000 sec  
d11 0.0300000 sec  
d12 0.0000000 sec

===== CHANNEL f1 =====

NUC1 13C  
P1 8.45 usec  
PL1 4.00 dB  
SFO1 125.769253 MHz

===== CHANNEL f2 =====

CPDPRG2 waltz16  
NUC2 1H  
PCPD2 65.00 usec  
PL2 4.00 dB  
PL12 13.00 dB  
PL13 13.00 dB  
SFO2 500.262508 MHz

F2 - Processing parameters

SI 65536  
SF 125.7753300 MHz  
WDW EM  
SSB 0  
LB 0  
GB 0  
PC 1.40

1D NMR plot parameters

CX 27.00 cm  
CY 0.00 cm  
F1P 250.000 ppm  
F1 31443.85 Hz  
F2P -25.000 ppm  
F2 -31441.39 Hz  
NUC1 13C  
NUC2 1H

77.269  
77.015  
76.761  
67.965  
64.597  
60.908  
56.254  
30.183  
27.966  
25.609

CDCl3

56

42

8

15

175

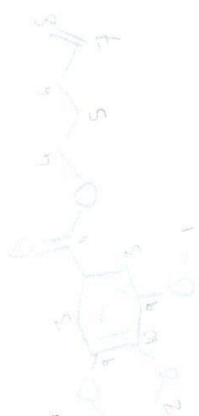

ppm

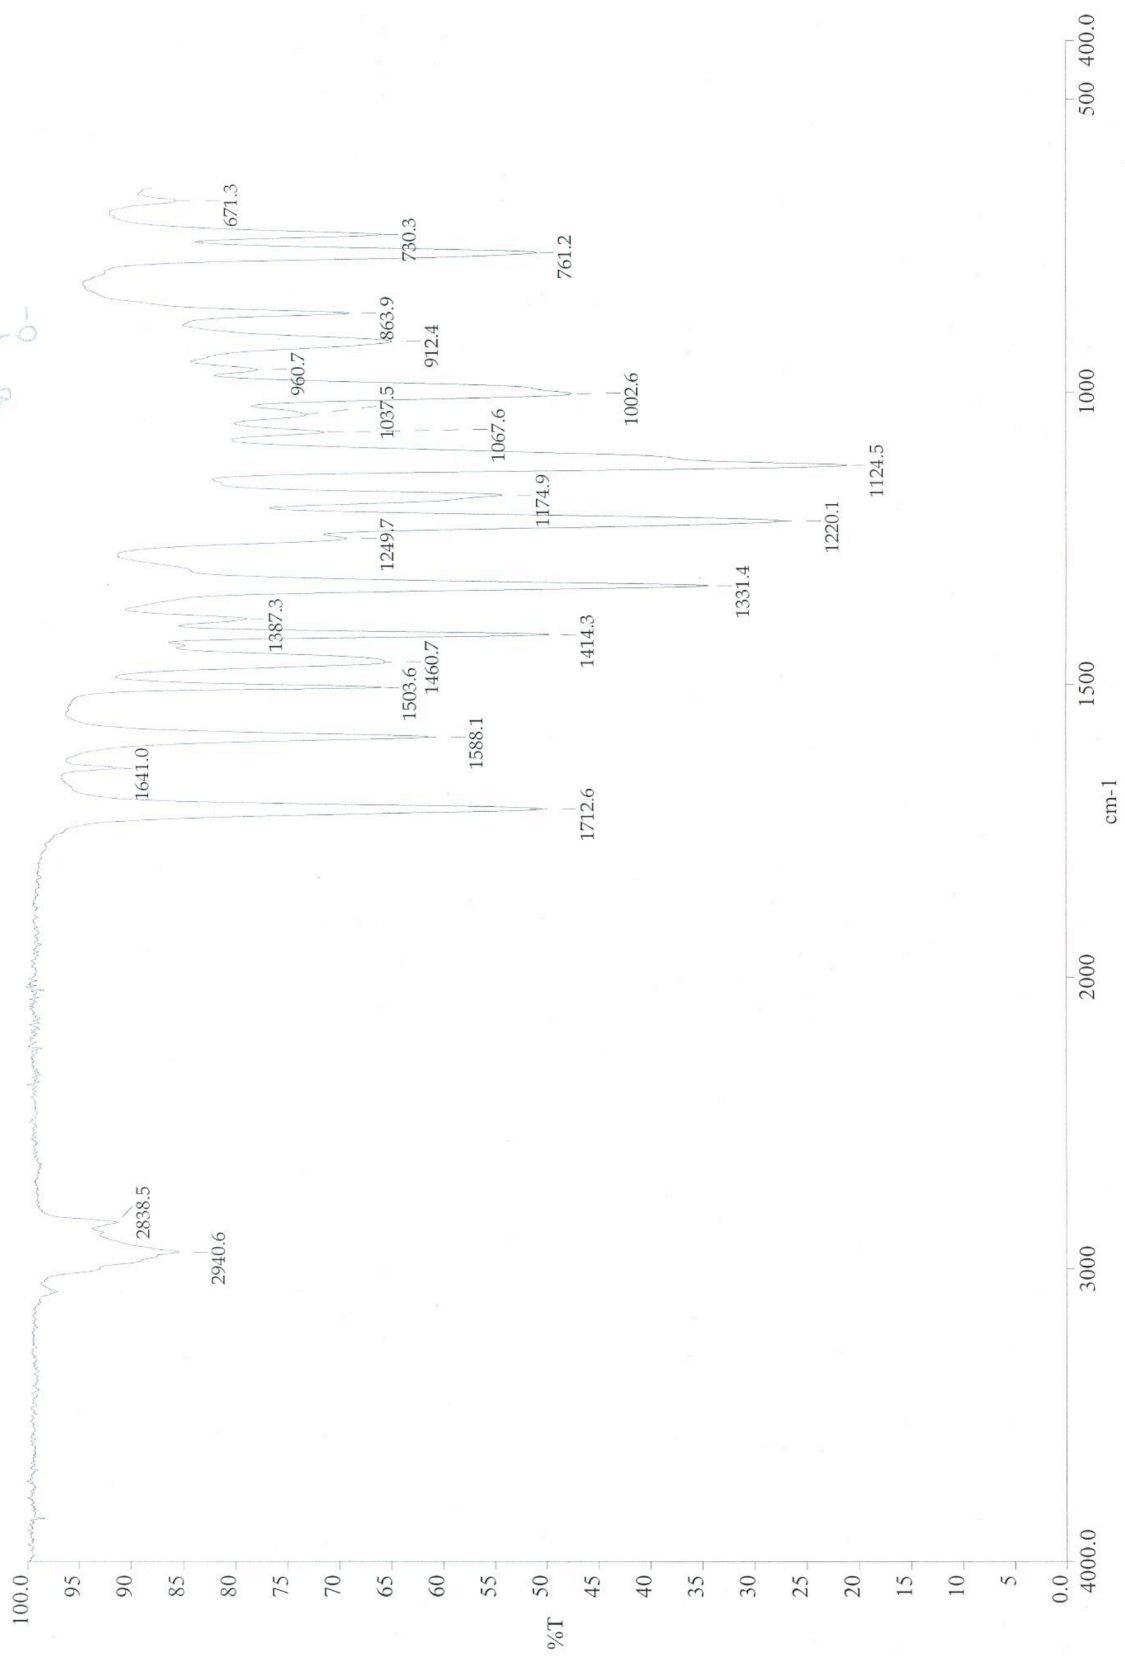

c:\pel\_data\spectra\glt-1-7.sp

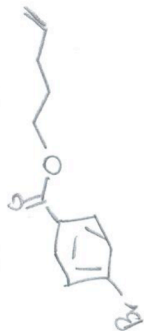

Standard ATM BB DRX500 1H

1.45241  
1.59754  
1.66425  
1.67782  
1.69170  
1.90701  
1.92036  
2.21064  
2.22431  
2.22534  
2.23956  
2.25365

4.33764  
4.35081  
4.36400  
5.02404  
5.02673  
5.04444  
5.04712  
5.06744  
5.07053  
5.07376  
5.07682  
5.10164  
5.10475  
5.10802  
5.11108  
5.82223  
5.82546  
5.84261  
5.84875  
5.85802  
5.86952  
5.87681  
5.88294  
5.89007  
5.90332

7.28135  
7.58624  
7.59030  
7.59341  
7.60392  
7.60728  
7.90734  
7.91161  
7.91508  
7.92515  
7.92861  
7.93296

Current Data Parameters  
NAME git-1-789  
EXPNO 1  
PROCNO 1

F2 - Acquisition Parameters  
Date\_ 20040217  
Time 18.25  
INSTRUM AV500  
PROBHD 5 mm BBO BB-1H  
PULPROG zg30  
TD 65536  
SOLVENT CDCl3  
NS 1.0  
DS 2  
SWH 10330.578 Hz  
FIDRES 0.157632 Hz  
AQ 3.172007 sec  
RG 181  
DM 48.400 usec  
DE 6.00 usec  
TE 300.0 K  
D1 1.00000000 sec

\*\*\*\*\* CHANNEL f1 \*\*\*\*\*  
NUC1 1H  
P1 10.75 usec  
PL1 -3.00 dB  
SF01 500.2030895 MHz

F2 - Processing parameters  
SI 32768  
SF 500.2000000 MHz  
WDW EM  
SSB 0  
LB 0.30 Hz  
GB 0  
PC 1.00

1D NMR plot parameters  
CX 27.00 cm  
CY 13.50 cm  
F1 12.000 ppm  
F2 6002.40 Hz  
F3 0.000 ppm  
F4 0.00 Hz  
F5 0.44444 ppm/cm  
F6 222.31111 Hz/cm

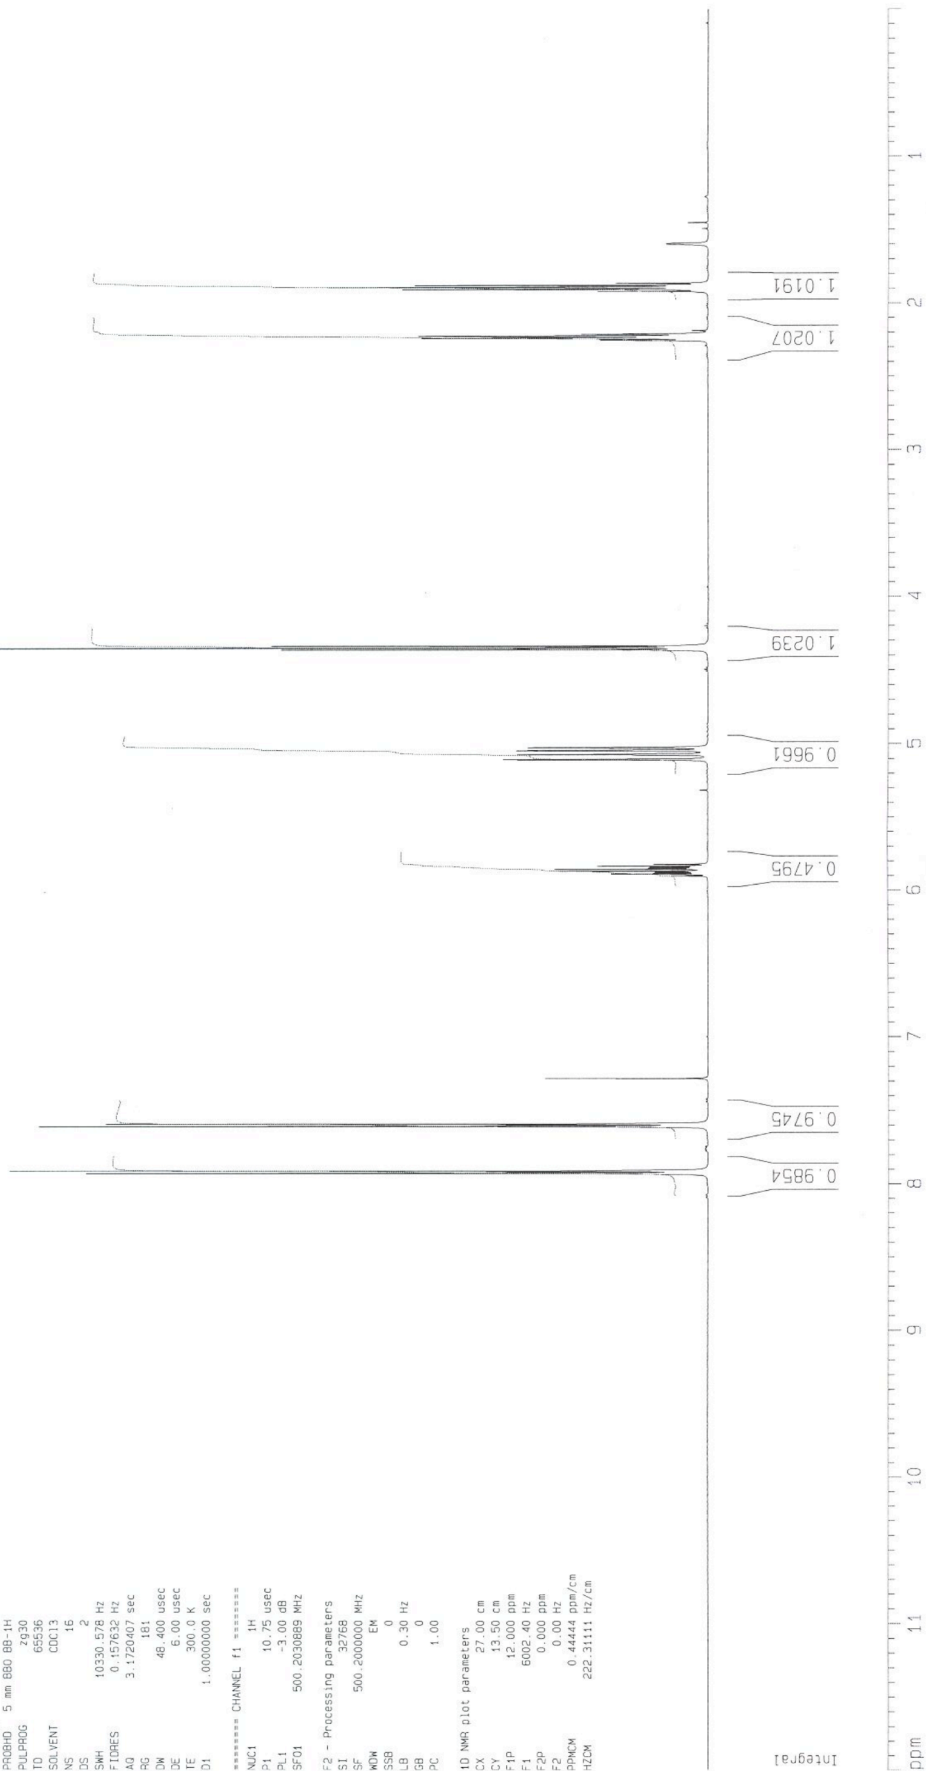

Integral

Standard ATM BB DRX500 13C

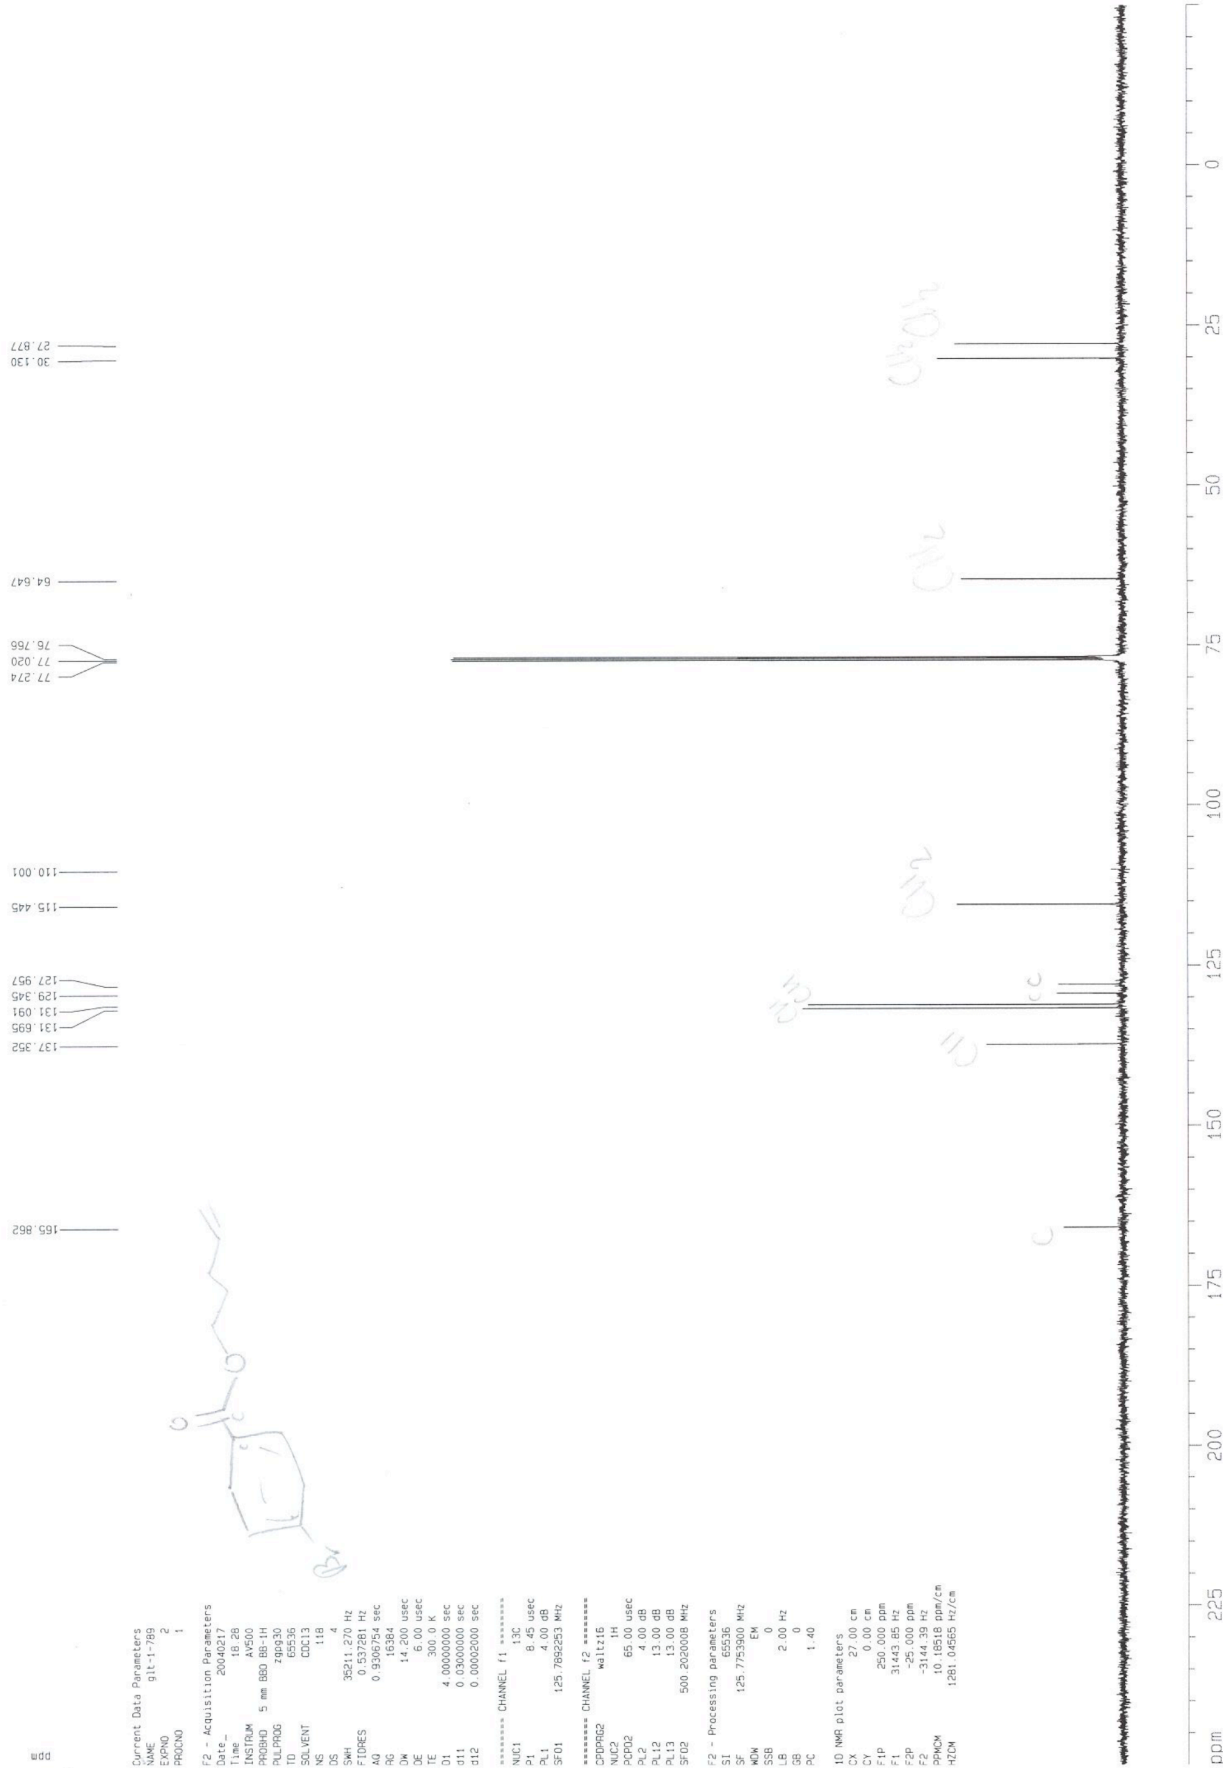

Current Data Parameters

NAME glt-1-789  
EXPNO 2  
PROCNO 1

F2 - Acquisition Parameters

Date\_ 20040217  
Time 18.28  
INSTRUM AV500  
PROBHD 5 mm BBO BB-1H  
PULPROG zgpg30  
TD 65536  
SOLVENT CDCl3  
NS 118  
DS 4  
SWH 36211.270 Hz  
FIDRES 0.537261 Hz  
AQ 0.9306754 sec  
RG 16384  
DM 14.200 usec  
DE 6.00 usec  
TE 300.0 K  
D1 4.0000000 sec  
d11 0.0000000 sec  
S12 0.0005200 sec

\*\*\*\*\* CHANNEL f1 \*\*\*\*\*

NUC1 13C  
P1 8.45 usec  
PL1 4.00 dB  
SFO1 125.7695253 Mhz

\*\*\*\*\* CHANNEL f2 \*\*\*\*\*

CPDPRG2 waltz16  
NUC2 1H  
PCPD2 65.00 usec  
PL2 4.00 dB  
PL12 13.00 dB  
PL13 13.00 dB  
SFO2 500.2020008 Mhz

F2 - Processing parameters

SI 65536  
SF 125.7753900 Mhz  
WDW EM  
SSB 0  
LB 2.00 Hz  
GB 0  
PC 1.40  
ID NO1 plot parameters  
CX 27.00 cm  
CY 0.00 cm  
F1P 250.000 ppm  
F1 31443.85 Hz  
F2P -25.000 ppm  
F2 -3144.39 Hz  
WDW EM  
SSB 0  
LB 10.1016 ppm/cm  
GB 0  
PC 1281.0455 Hz/cm

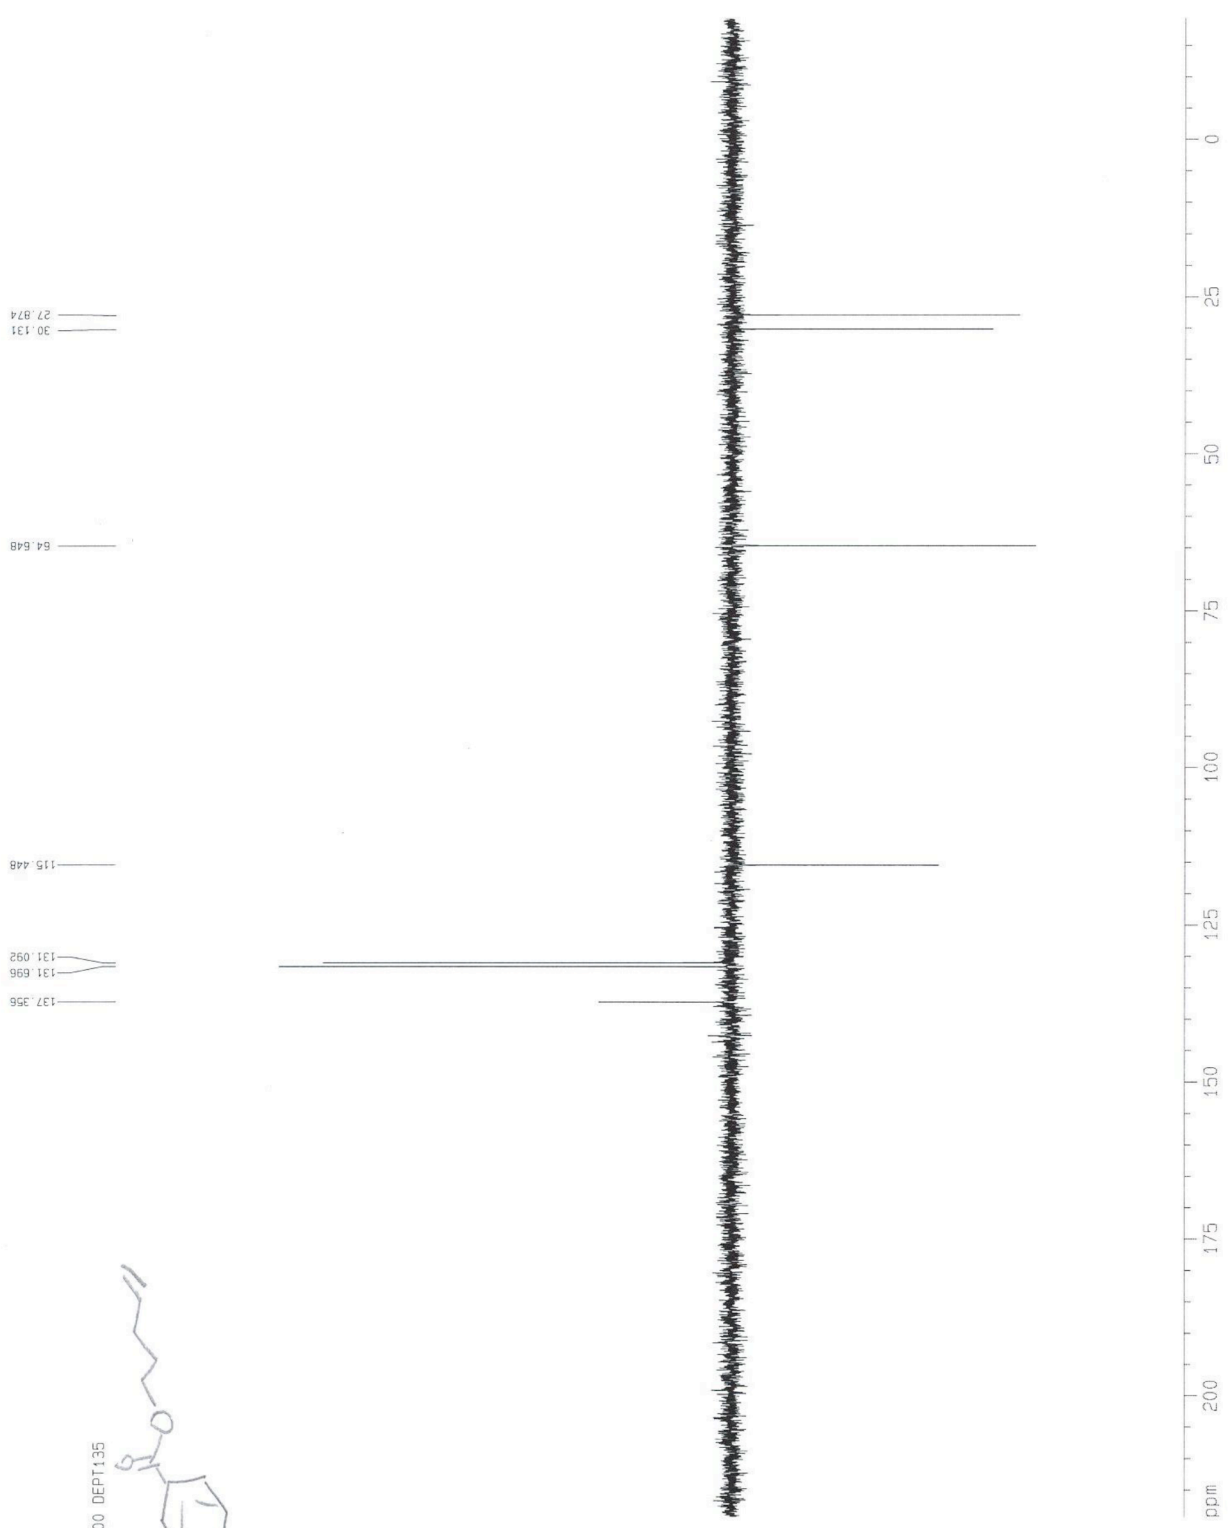

Standard ATM BB DRX500 DEPT135

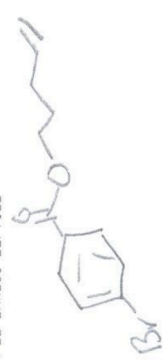

ppm

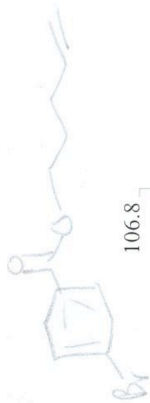

78A

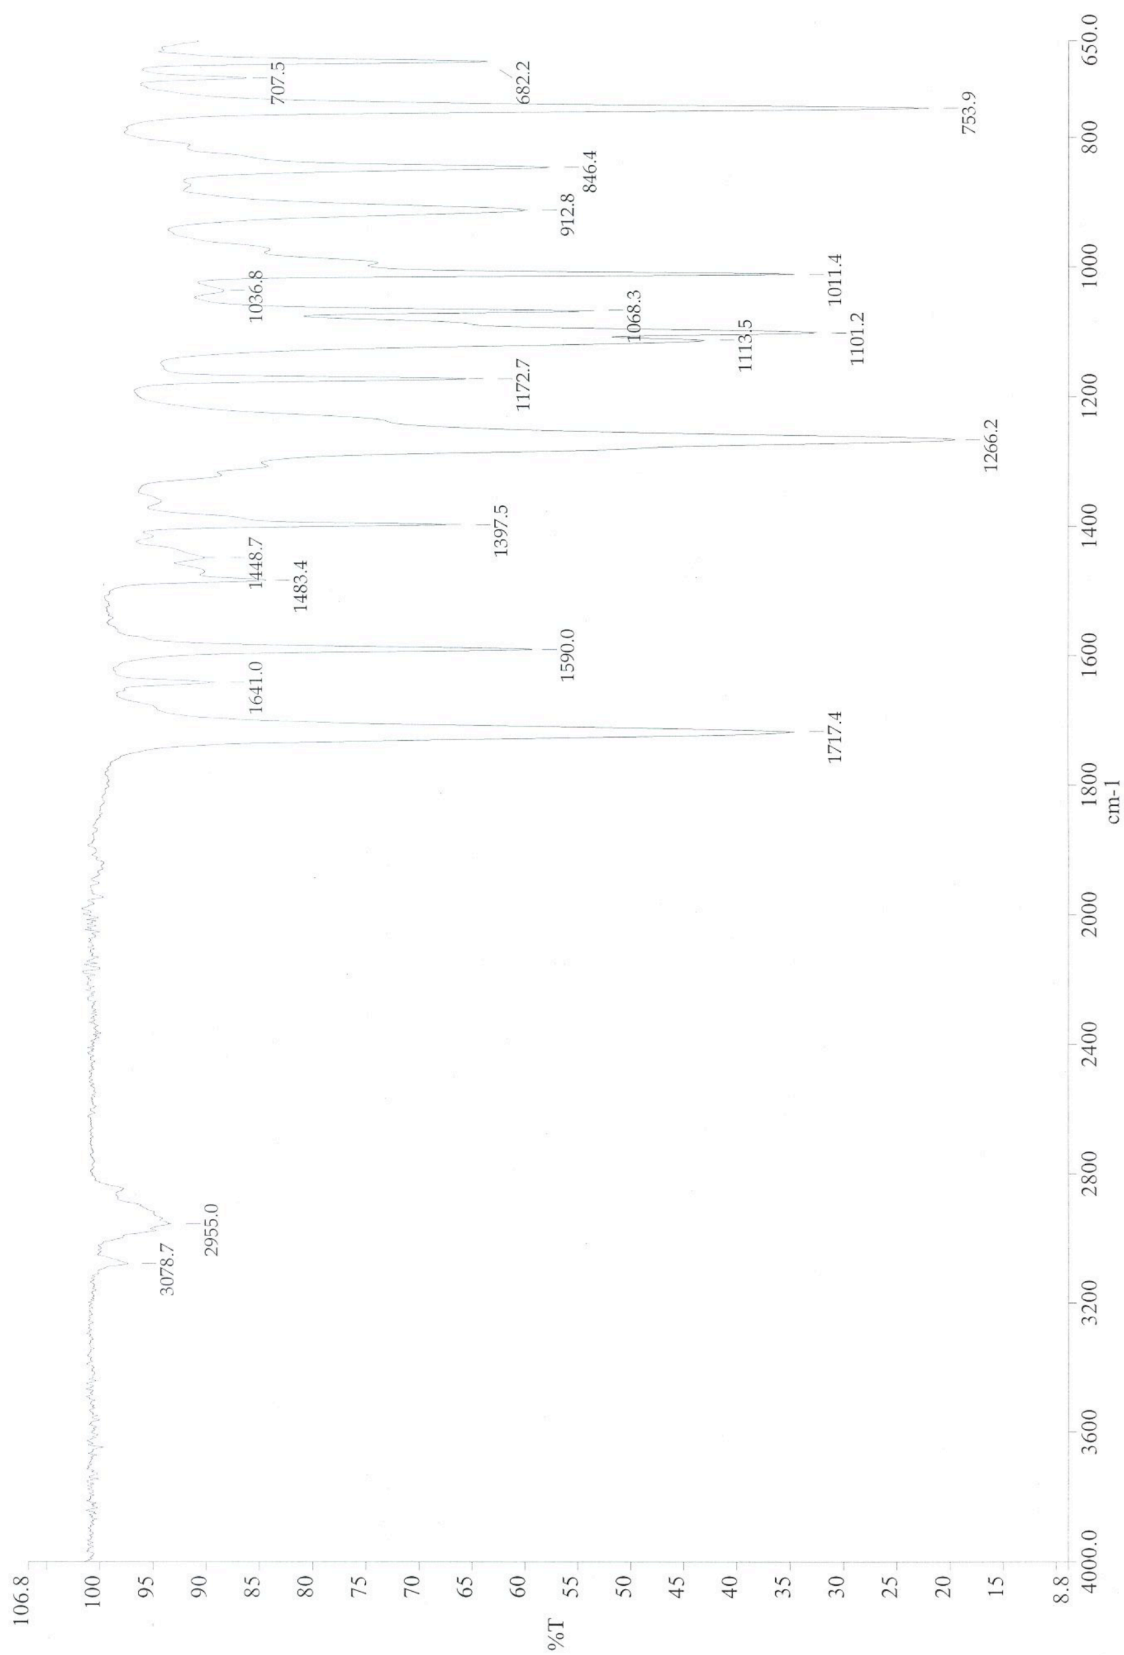

c:\pel\_data\spectra\gtl-1-32.sp

# Standard ATM BB DRX500 1H

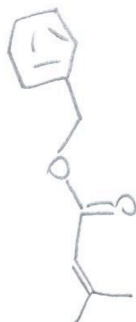

Current Data Parameters

NAME g1t-1-779

EXPNO 3

PROCNO 1

F2 - Acquisition Parameters

Date\_ 20040217

Time 18.53

INSTRUM AV500

PULPROG 5 mm BBO BB-1H

TD 2930

SOLVENT CUC13

NS 2

DS 1

SWH 10330.576 Hz

FIDRES 3.157632 Hz

RG 3.1720407 sec

BO 143.7

DE 48.400 usec

TE 300.0 K

101 1.00000000 sec

\*\*\*\*\* CHANNEL f1 \*\*\*\*\*

NUC1 1H

P1 10.75 usec

PL1 -3.00 dB

SFO1 500.2030889 MHz

F2 - Processing parameters

SI 32768

SF 500.2000000 MHz

WDW EM

SSB 0

LB 0.30 Hz

GB 0

PC 1.00

10 NMR plot parameters

CX 27.00 cm

CY 13.50 cm

F1P 12.000 ppm

F2P 0.000 ppm

F3P 0.000 ppm

PC 0.44444 Hz/cm

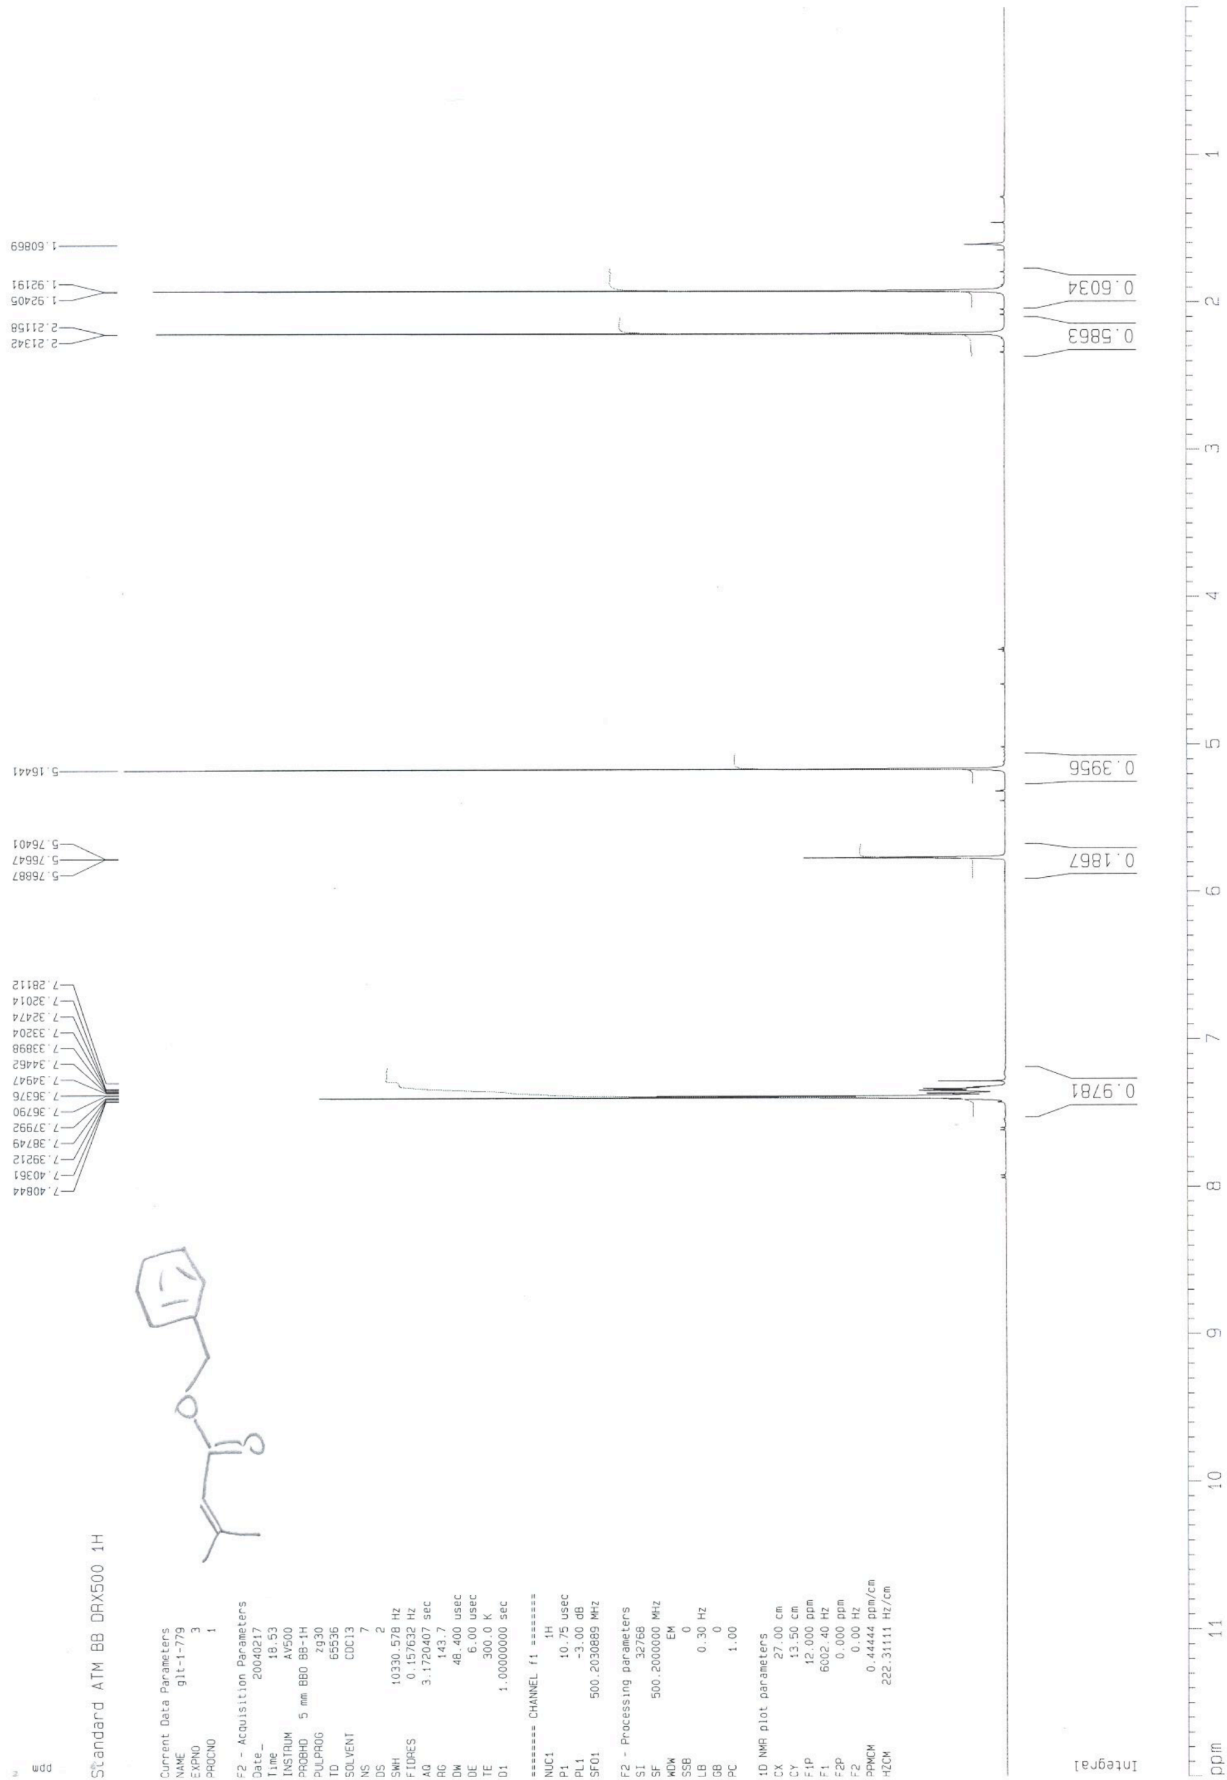



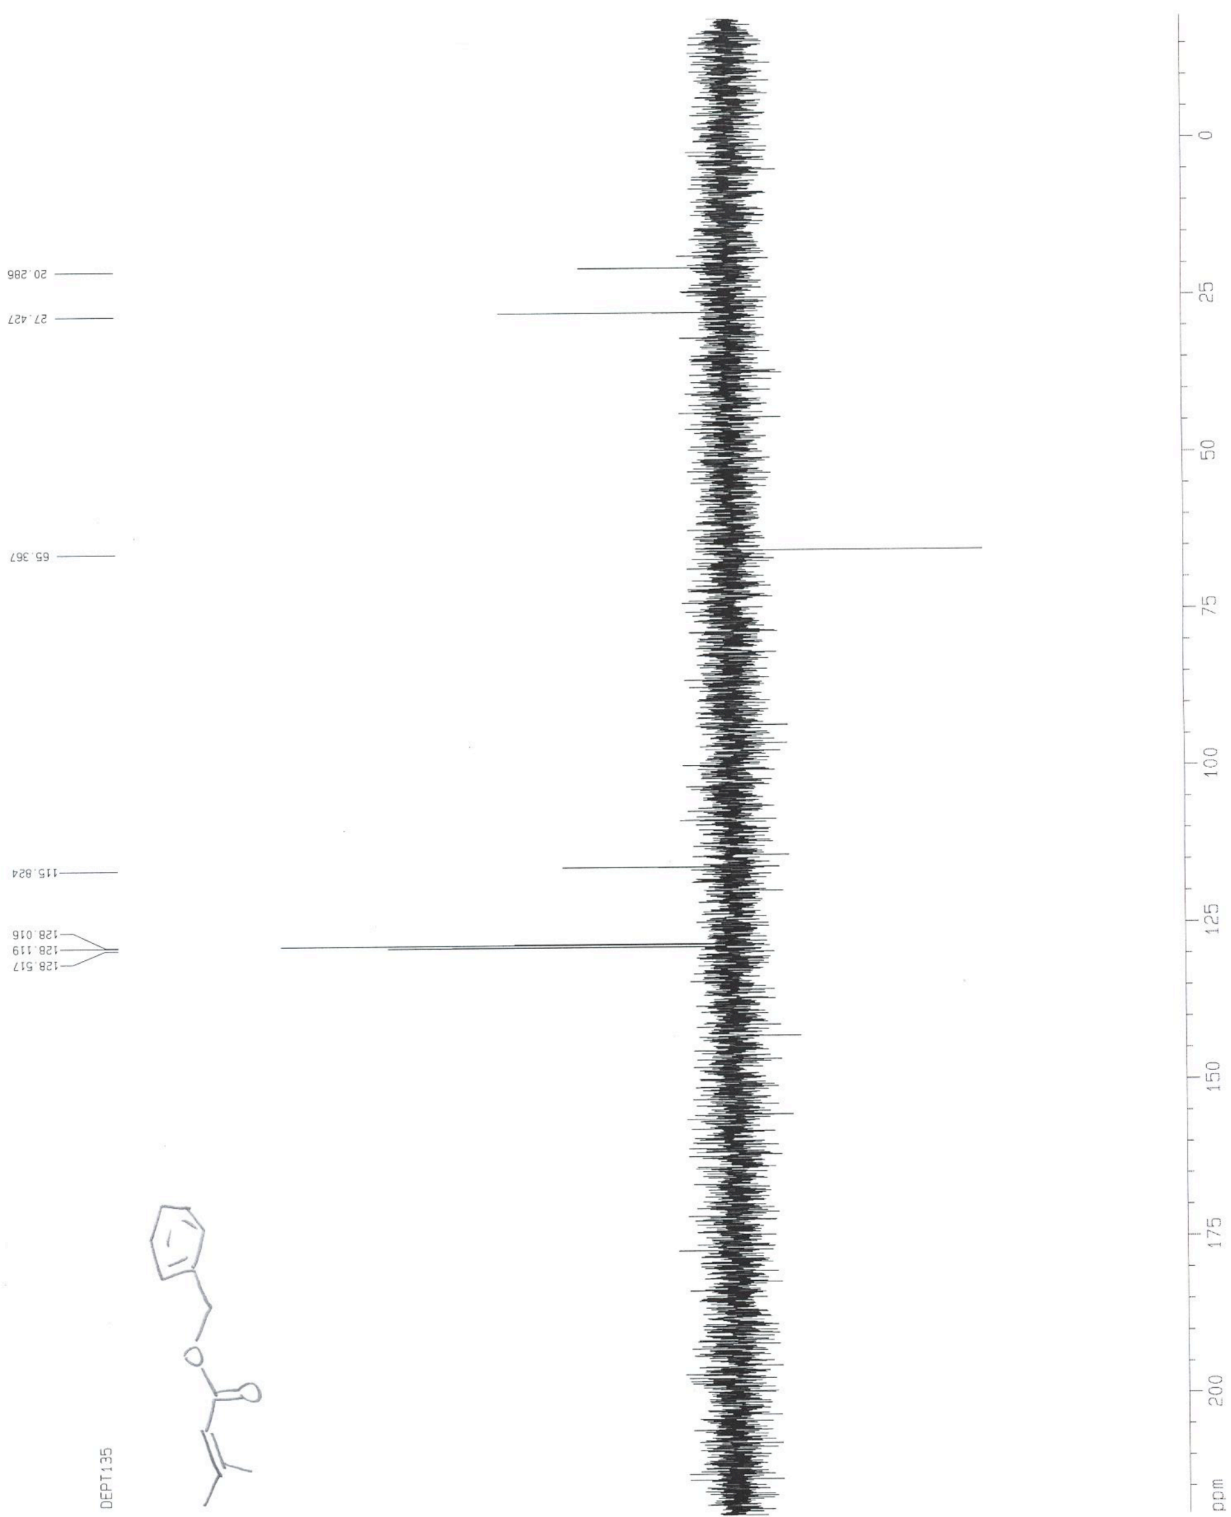

Standard ATM BB DRX500 DEPT135

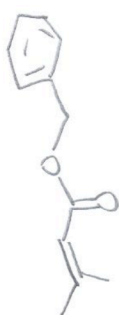

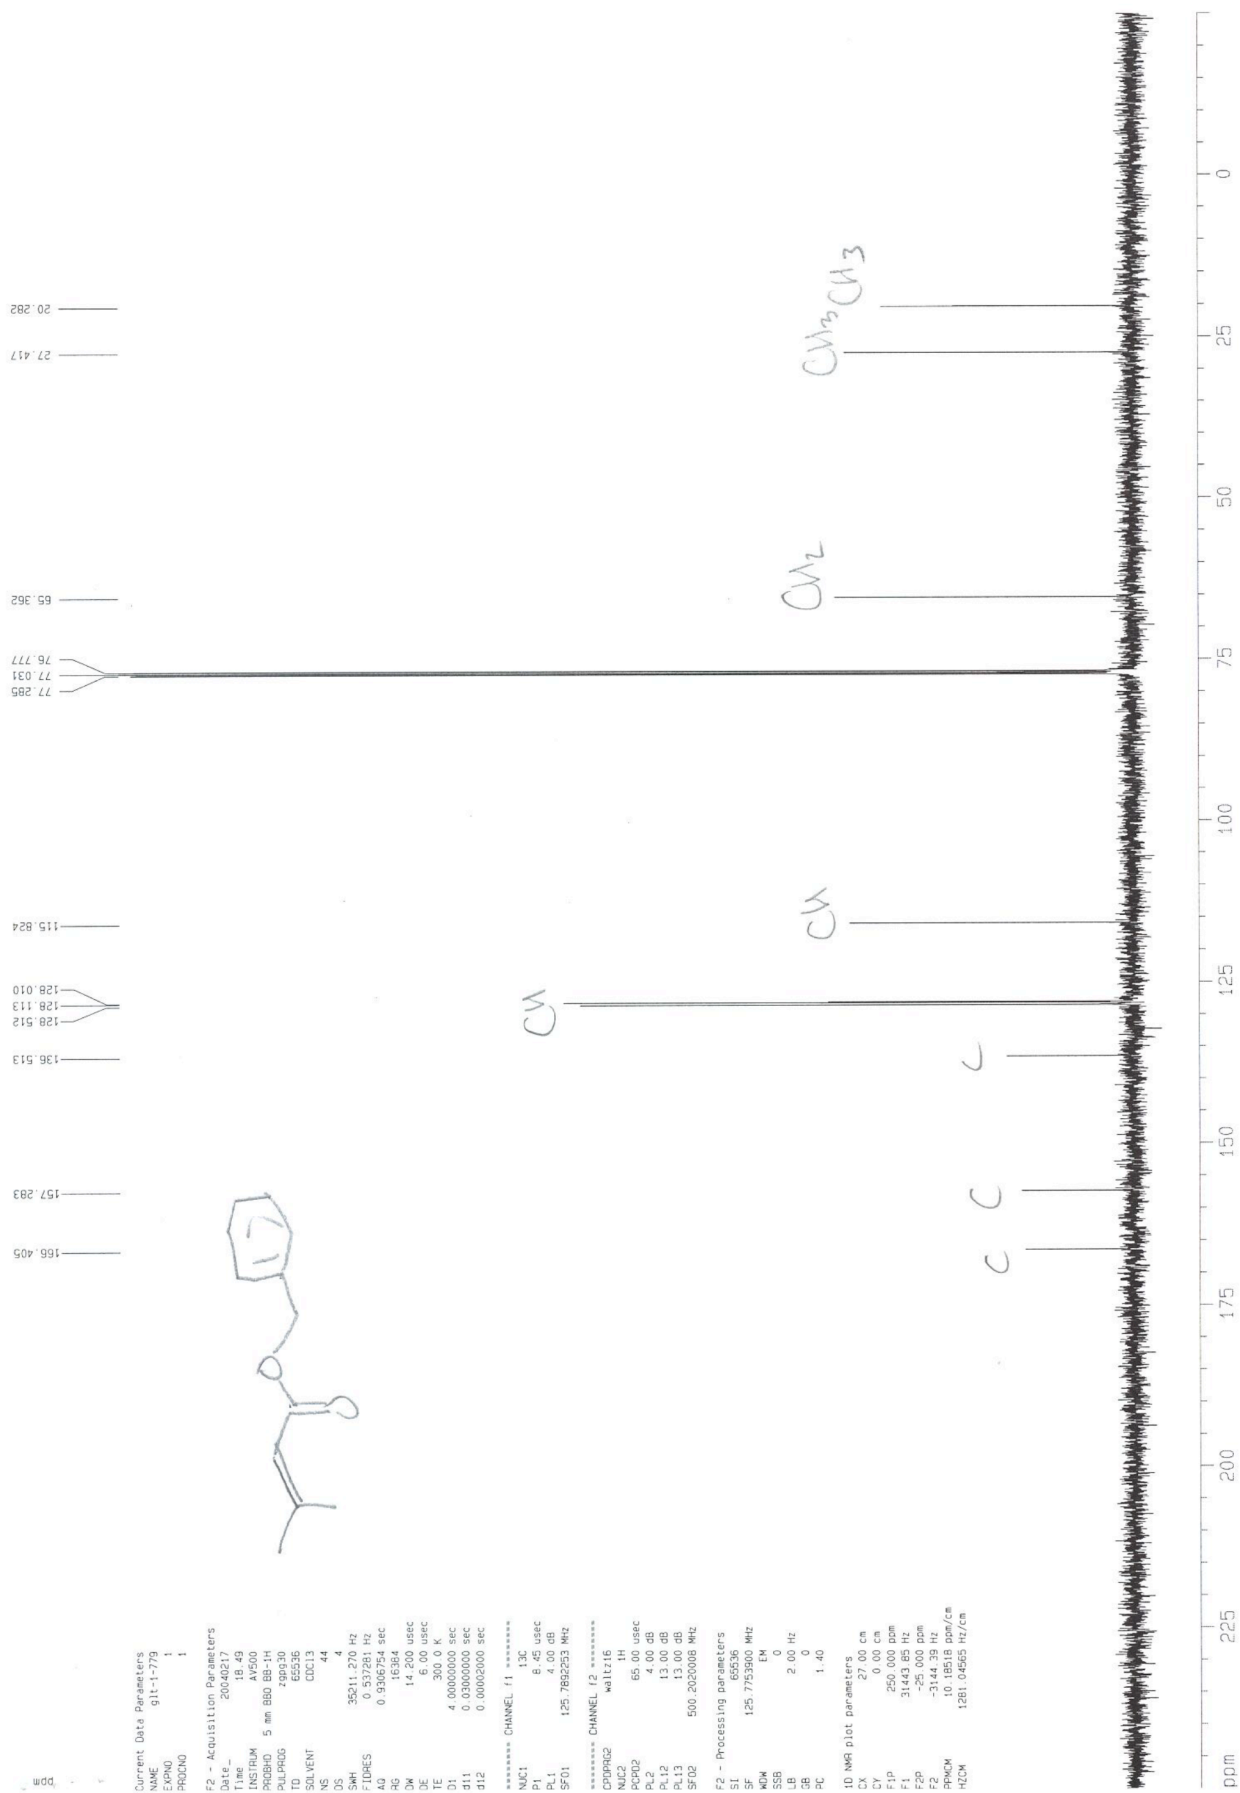

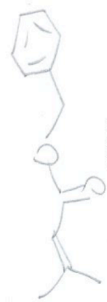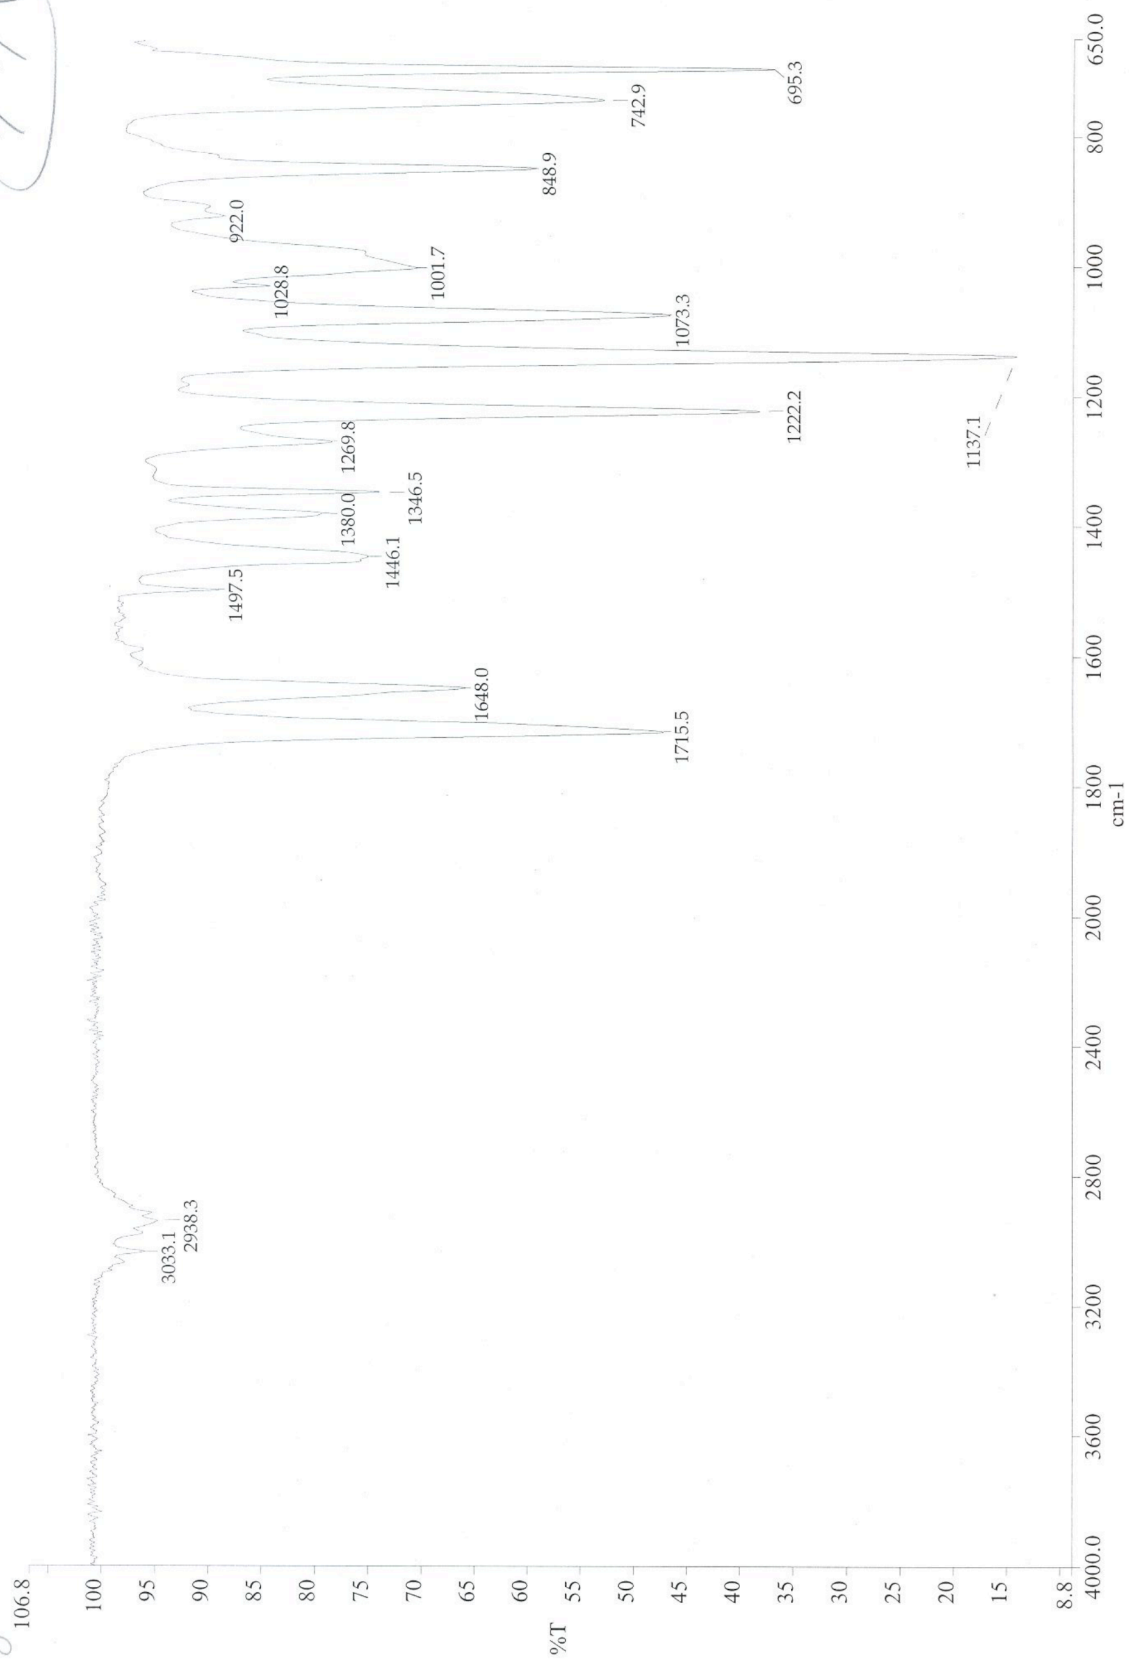

c:\pel\_data\spectra\gli-1~31.sp

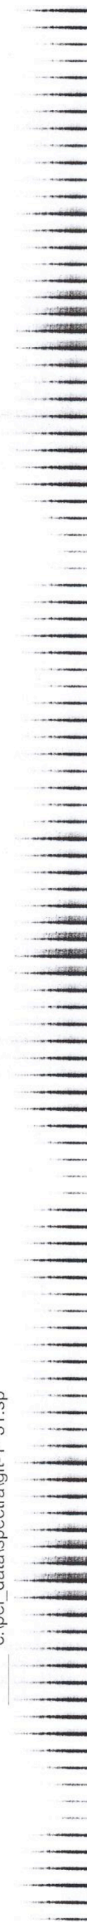

770

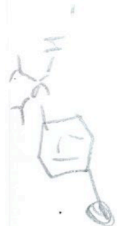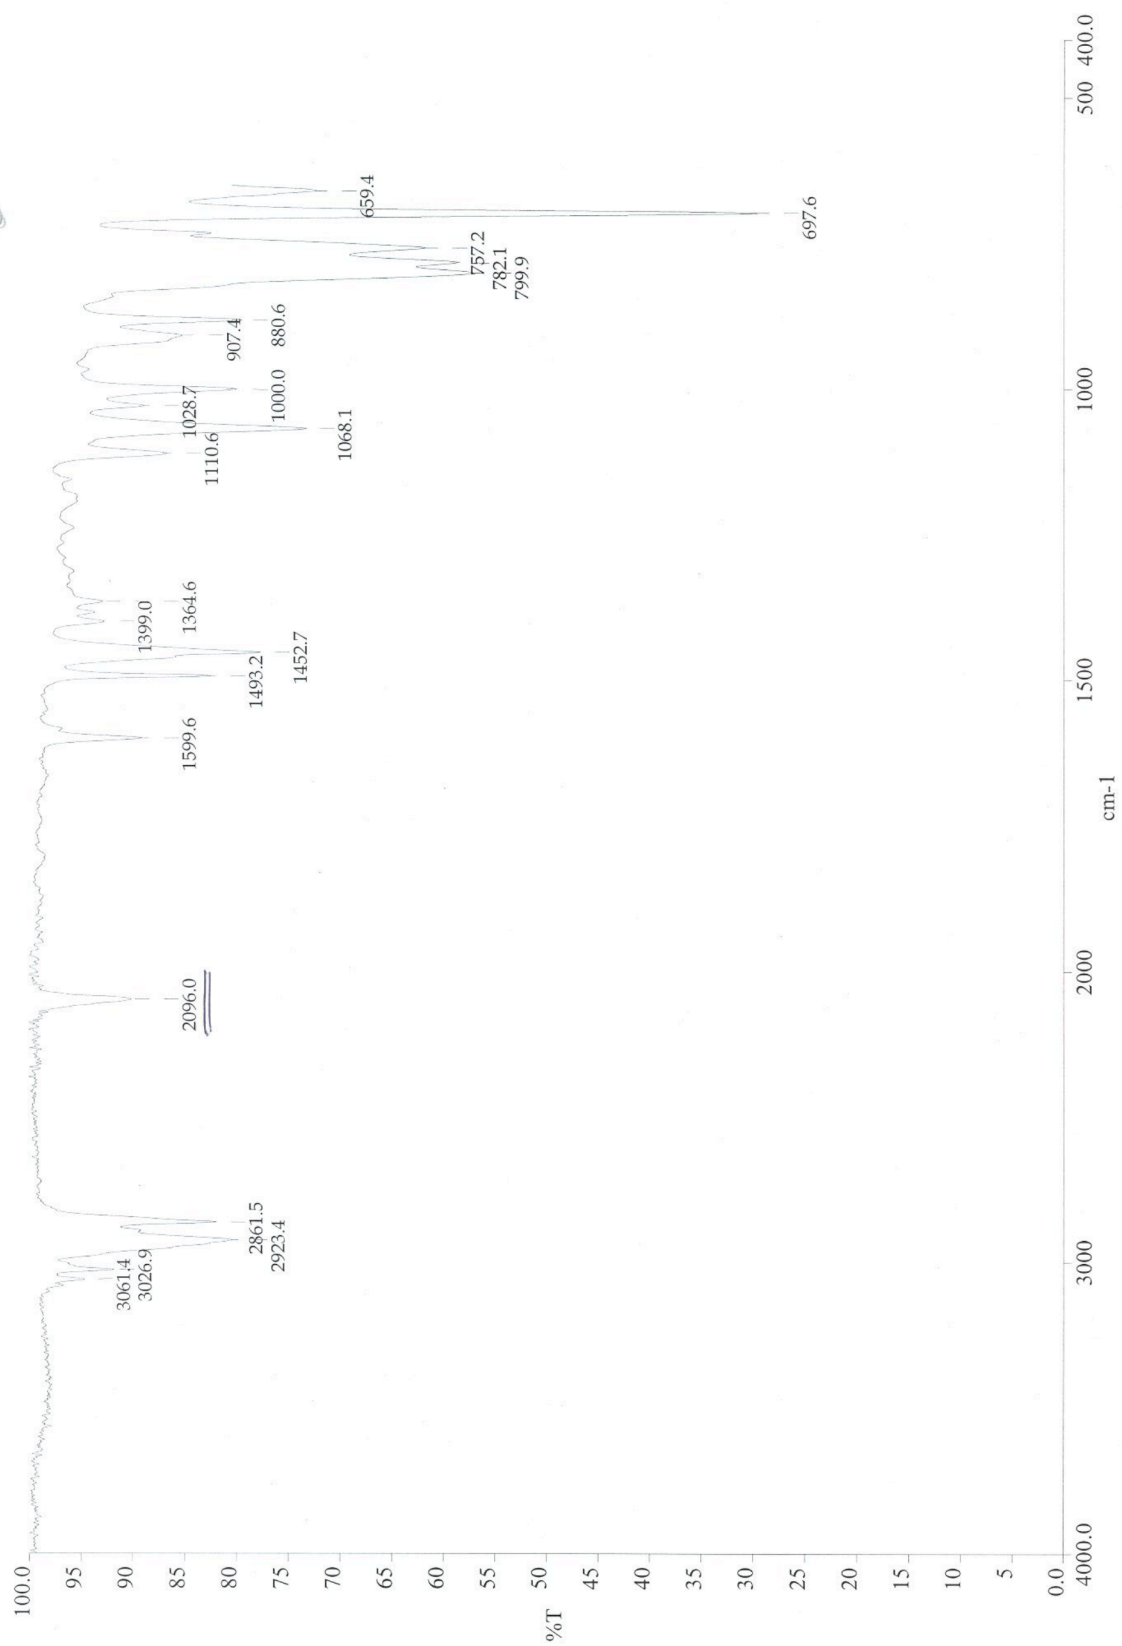

c:\pel\_data\spectra\glt-1-20.sp

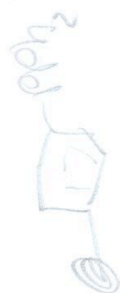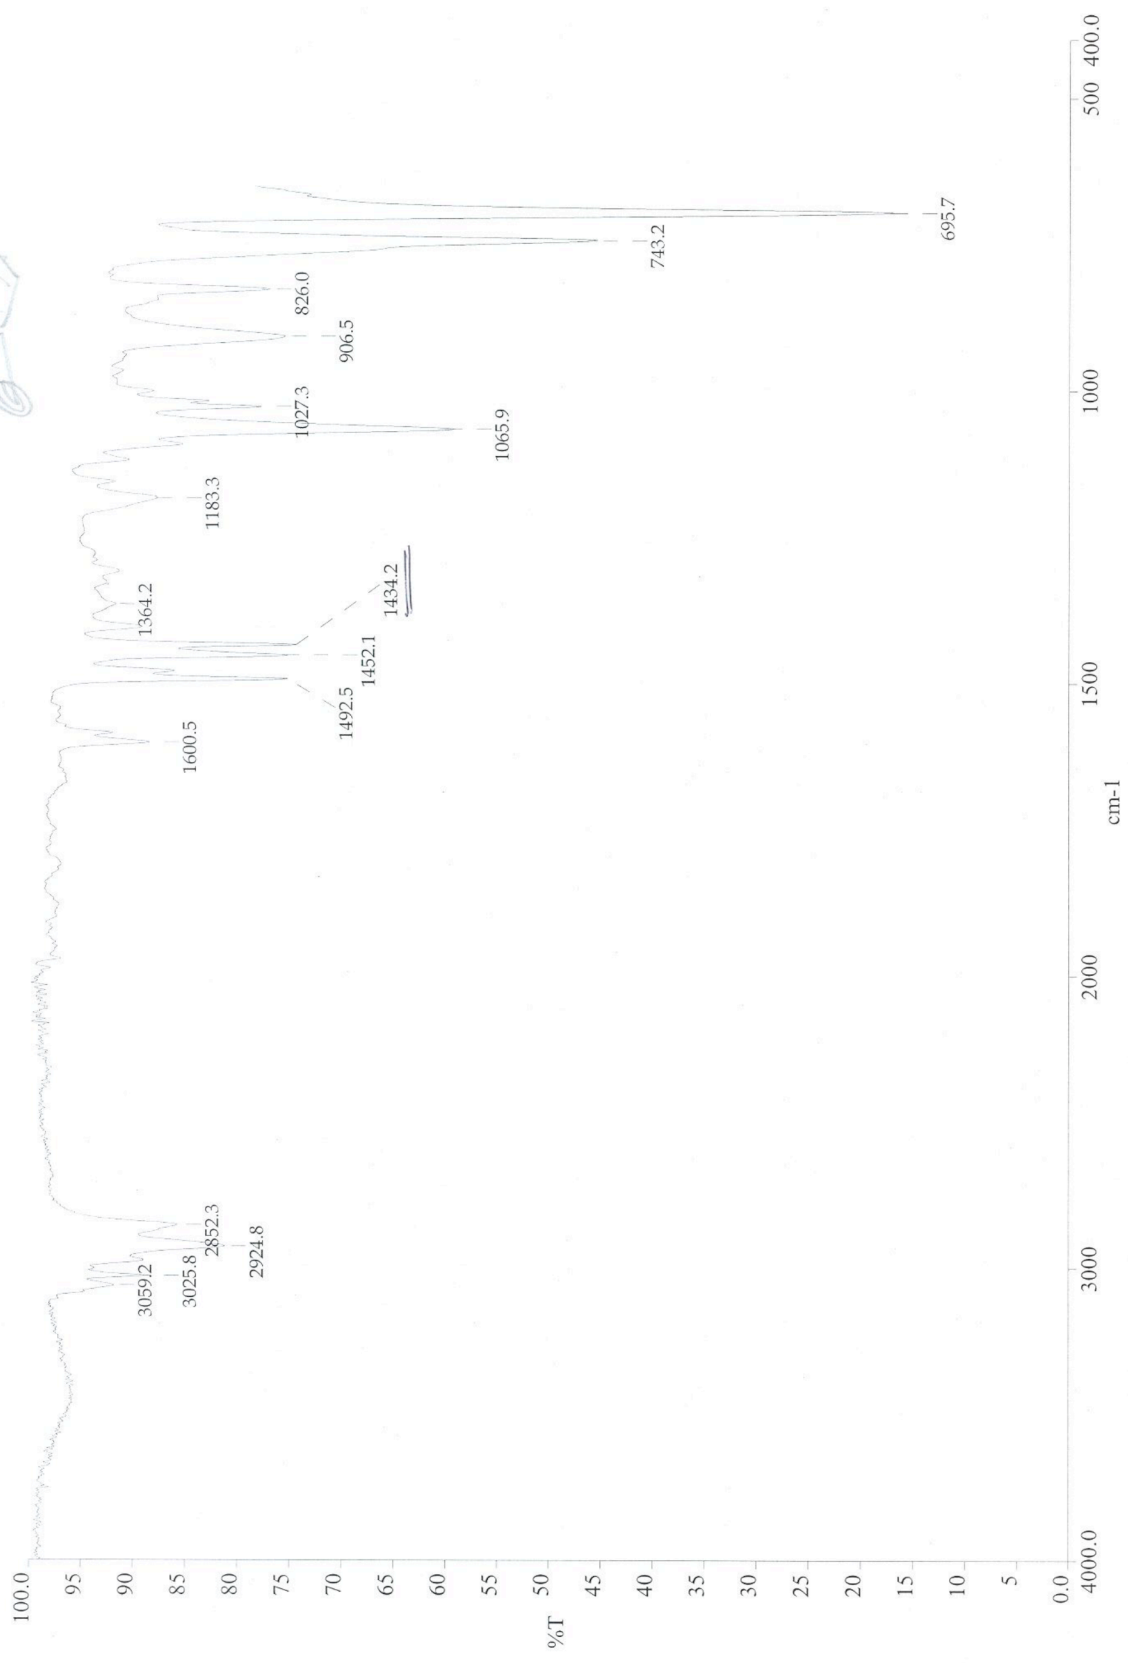

c:\pel\_data\spectra\glt-1-76.sp
